# Supplementary material for: Analysis of Adaptation Mutants in the Hemagglutinin of the Influenza A(H1N1)pdm09 Virus
Source: PubMed Central journal article supplement (PMC3720954; doi:10.1371/journal.pone.0070005), 2013-07-23

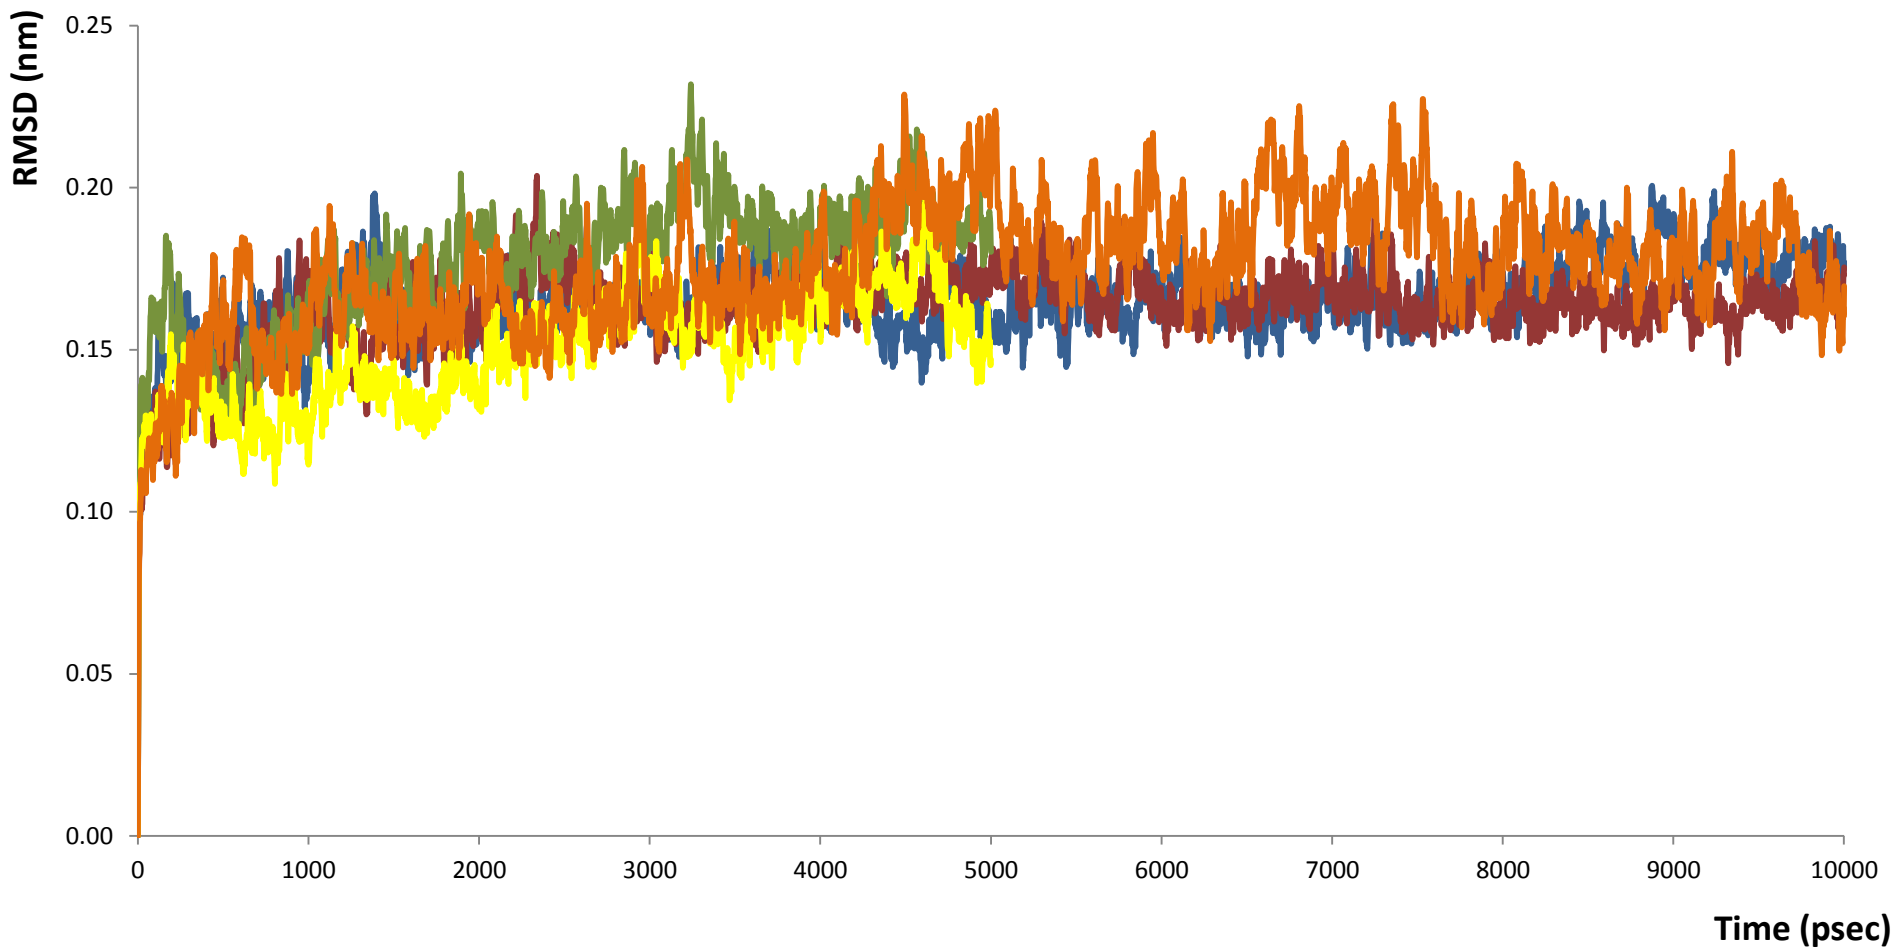

Supplement: pone.0070005.s001.pdf [file pone.0070005.s001.pdf]
